# Supplementary material
Source: publisher figshare collection journal article supplement (https://gsajournals.figshare.com/ndownloader/files/13507313)
Supplement: Supplementary file 1 [file 13507313]

**Table S2.** Primers used in this study

| Primer name | Sequence 5’-3’ |
| --- | --- |
| 5’-smo50.1 | CCACACACACAATTCTCTCTCTCT |
| 3’-smoM13f | GTCGTGACTGGGAAAACCCTGGCGAGCATGACGGACATTTTGACGGAG |
| 5’-smoM13r | TCCTGTGTGAAATTGTTATCCGCTCAGCAACCTTTACCACCATTATCA |
| 3’-smo30.1 | GGACCAGCCGAGGAATATAATACT |
| M13F | cgccagggttttcccagtcacgac |
| M13R | Agcggataacaatttcacacagga |
| Hysplit | ggatgcctccgctcgaagta |
| Ygsplit | cgttgcaagacctgcctgaa |
| 5’-smop | TAGAACTAGTGGATCCGTTTGGTGAGATTGTGTGTGTGT |
| 3’-SmoGFP | CAGCCCTTCTTCCGCGCGAACCG |
| 5’GFPstart | CGGAAGAAGGGCTGGATGGTGAGCAAGGGCGAGGAGCTG |
| 5’-Trpc | CGGTATCGATAAGCTGTGGAGATGTGGAGTGGGCGCTTA |
| 5’-smoGB | CATGGAGGCCGAATTCATGTCCGTCATGCTGCAAACTCCA |
| 3’-smoGB | GCAGGTCGACGGATCCCTACCAGCCCTTCTTCCGCGCGAA |
| 3’ -smoGA | GGAGGCCAGTGAATTCATGTCCGTCATGCTGCAAACTCCA |
| 5’-smoGA | CGAGCTCGATGGATCC CTACCAGCCCTTCTTCCGCGCGAA |
| 5’-ras2GB | CATGGAGGCCGAATTCATGGCTCAGTCAAAGTTCCTACGC |
| 3’-rasGB | GCAGGTCGACGGATCC TTACATCAAGACACACTTGGAGCA |
| 5’-ras2GA | GGAGGCCAGTGAATTCATGGCTCAGTCAAAGTTCCTACGC |
| 3’-ras2GA | CGAGCTCGATGGATCCTTACATCAAGACACACTTGGAGCA |
| 5’-gef1GB | CATGGAGGCCGAATTCATGCTCATGACACAGACGGTTGTG |
| 3’-gef1GB | GCAGGTCGACGGATCCTCACAGGAACCCAGACTCGGCGAG |
| 5’-Gef2GB | CATGGAGGCCGAATTCATGGTAATGCCCGGCGACCATTCC |
| 3’-Gef2GB | GCAGGTCGACGGATCCTCAAGCAGCAGGATGATCTCTGTG |
| 5’-Ras1GA | GGAGGCCAGTGAATTCATGACTGGAAGGTTGCAGCTCCAC |
| 3’-Ras1GA | CGAGCTCGATGGATCCTCACAATATAACACACTTGATCGG |
